# Supplementary material for: Influence of the anchoring number in a carbazole-based photosensitizer on the photovoltaic performance of p-type NiO dye sensitized solar cells
Source: Royal Society of Chemistry journal article supplement (doi:10.1039/c4ra08271k), 2014-01-01
Supplement: c4ra08271k1.pdf [file c4ra08271k1.pdf]

Electronic Supplementary Information for

# Influence of the anchoring number in carbazole- based photosensitizer on the photovoltaic performance of p-type NiO dye sensitized solar cells

*Ji Young Park, Bo Youn Jang, Chi Hwan Lee, Hyeong Jin Yun\*, Jae Hong Kim\**

Department of Chemical Engineering, Yeungnam University, Gyeongsangbuk-do,  
South Korea 712-749

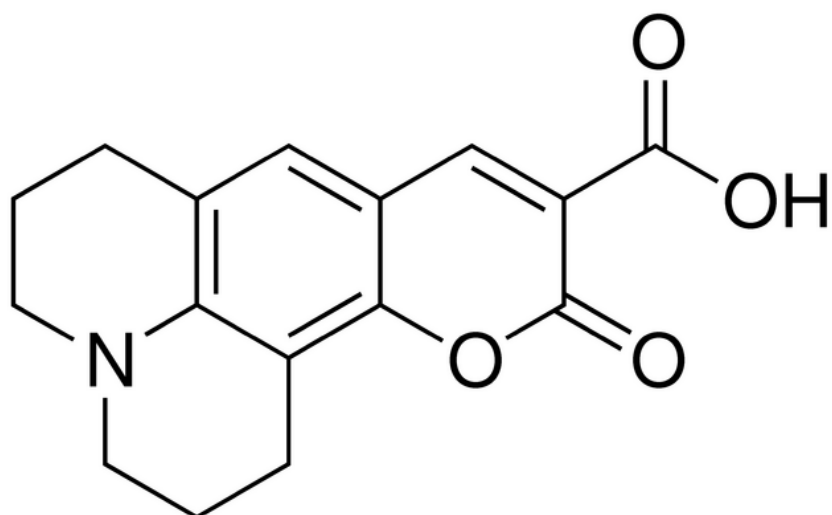

**Figure S1.** Molecular structure of C343

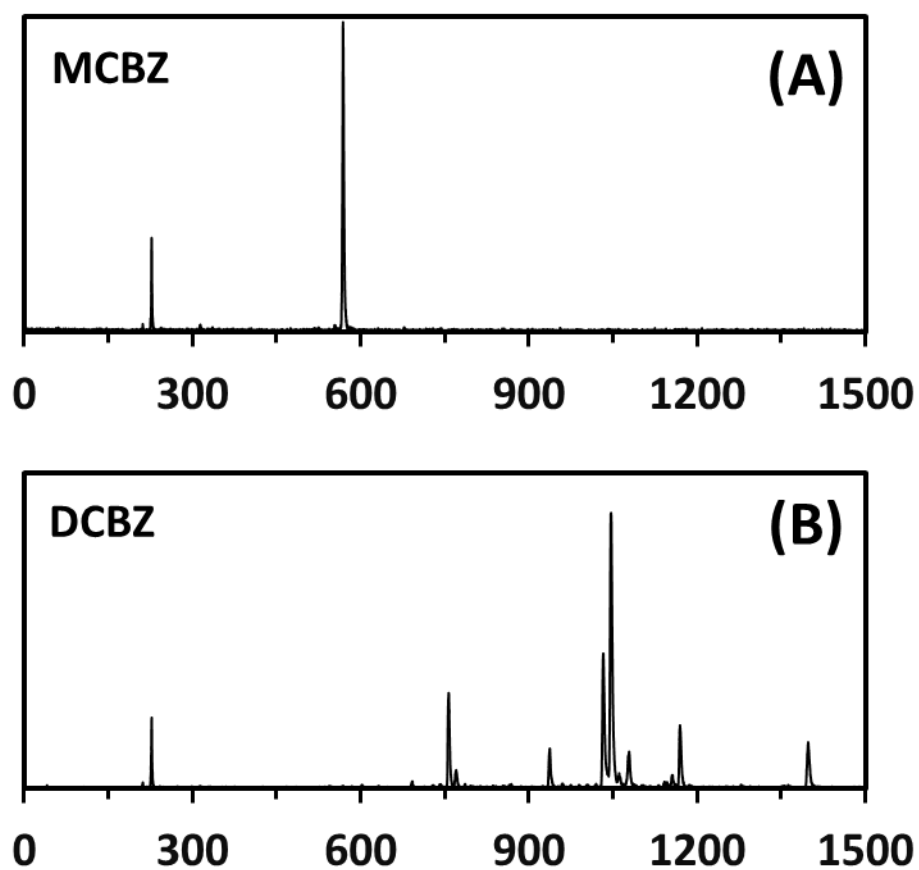

**Figure S2.** Mass spectra of (A) MCBZ and (B) DCBZ

**Table S1.** Electrochemical parameters of MCBZ and DCBZ. Their  $E_g$  (band gap) is determined from the intersection of the absorption and emission spectra in the DMF solution. The oxidation potential ( $E_{OX}$ ) of the dyes are measured by cyclic voltammetry in a DMF solution.

| <b>Dye</b>  | <b><math>E_g</math> (eV)</b> | <b><math>E_{ox}</math> (V)</b> | <b><math>E_{HOMO}</math> (eV)</b> | <b><math>E_{LUMO}</math> (eV)</b> |
|-------------|------------------------------|--------------------------------|-----------------------------------|-----------------------------------|
| <b>MCBZ</b> | 2.18                         | 0.39                           | -4.69                             | -2.51                             |
| <b>DCBZ</b> | 2.16                         | 0.42                           | -4.72                             | -2.56                             |
